# Supplementary material
Source: PubMed Central journal article supplement (PMC3748479)
Supplement: SD6.pdf [file SD6.pdf]

SUPPLEMENTAL TABLE 1  
Confirmation of real-time quantitative polymerase chain reaction (qPCR) results by genotyping

|            | < 2 DNA copies/ $\mu$ L template |           | 2–100 DNA copies/ $\mu$ L template |           | > 100 DNA copies/ $\mu$ L template |           | Total detected | Total genotyped* |
|------------|----------------------------------|-----------|------------------------------------|-----------|------------------------------------|-----------|----------------|------------------|
|            | Detected                         | Genotyped | Detected                           | Genotyped | Detected                           | Genotyped |                |                  |
| Peripheral | 26                               | 17        | 11                                 | 11        | 10                                 | 10        | 47             | 38               |
| Placenta   | 36                               | 23        | 9                                  | 8         | 10                                 | 10        | 55             | 41               |
| Cord       | 22                               | 12        | 5                                  | 4         | 1                                  | 1         | 28             | 17               |
| Total      | 84                               | 52        | 25                                 | 23        | 21                                 | 21        | 130            | 96               |

\*Five molecular markers per species were used for genotyping of parasite clones in different compartments. Nested or seminested PCR and capillary electrophoresis were used. Molecular markers genotyped for *Plasmodium falciparum*: the microsatellites ARA2, TA1, PolyA, and PFPK2<sup>1</sup> and the gene *msp2*.<sup>2</sup> Molecular markers genotyped for *P. vivax*: the microsatellites 1.501, 3.502, 3.26, and MS16 and the gene *msp3a*.<sup>3</sup>

1. Snounou G, Viriyakosol S, Zhu XP, Jarra W, Pinheiro L, do Rosario VE, Thaitong S, Brown KN, 1993. High sensitivity of detection of human malaria parasites by the use of nested polymerase chain reaction. *Mol Biochem Parasitol* 61: 315–320.

2. Anderson TJ, Su XZ, Bockarie M, Lagog M, Day KP, 1999. Twelve microsatellite markers for characterization of *Plasmodium falciparum* from finger-prick blood samples. *Parasitology* 119: 113–125.

3. Felger I, Beck H, 2008. *msp2* genotyping of *Plasmodium falciparum* by capillary electrophoresis and GeneMapper<sup>®</sup> Program. Moll K, Ljungström I, Perlmann H, Scherf A, Wahlgren M, eds. *Methods in Malaria Research*. Manassas, VA: Malaria Research and Reference Reagent Resource Center (MR4), 243–247.

SUPPLEMENTAL TABLE 2  
Species combinations across compartments detected by qPCR

| Peripheral           | Placenta             | Cord                 | Frequency (%) |
|----------------------|----------------------|----------------------|---------------|
| <i>P. falciparum</i> | <i>P. falciparum</i> | <i>P. falciparum</i> | 12 (19.4)     |
| <i>P. vivax</i>      | <i>P. vivax</i>      | Negative             | 11 (17.7)     |
| Negative             | <i>P. falciparum</i> | Negative             | 8 (12.9)      |
| <i>P. vivax</i>      | <i>P. vivax</i>      | <i>P. vivax</i>      | 5 (8.1)       |
| <i>P. falciparum</i> | <i>P. falciparum</i> | Negative             | 5 (8.1)       |
| <i>P. falciparum</i> | Negative             | Negative             | 4 (6.5)       |
| Negative             | <i>P. vivax</i>      | Negative             | 4 (6.5)       |
| Mixed                | Mixed                | Mixed                | 2 (3.2)       |
| Negative             | <i>P. falciparum</i> | <i>P. falciparum</i> | 2 (3.2)       |
| <i>P. vivax</i>      | Negative             | <i>P. vivax</i>      | 2 (3.2)       |
| <i>P. falciparum</i> | Negative             | <i>P. falciparum</i> | 1 (1.6)       |
| <i>P. vivax</i>      | Mixed                | Negative             | 2 (3.2)       |
| <i>P. vivax</i>      | Mixed                | <i>P. vivax</i>      | 1 (1.6)       |
| <i>P. vivax</i>      | <i>P. falciparum</i> | <i>P. falciparum</i> | 1 (1.6)       |
| <i>P. falciparum</i> | Mixed                | <i>P. falciparum</i> | 1 (1.6)       |
| Negative             | Mixed                | <i>P. vivax</i>      | 1 (1.6)       |
